# Supplementary material for: Loss of ESRP1 blocks mouse oocyte development and leads to female infertility
Source: Oxford University Press journal article supplement (doi:10.1242/dev.196931), 2020-01-01
Supplement: dev196931supp.pdf [file dev196931supp.pdf]

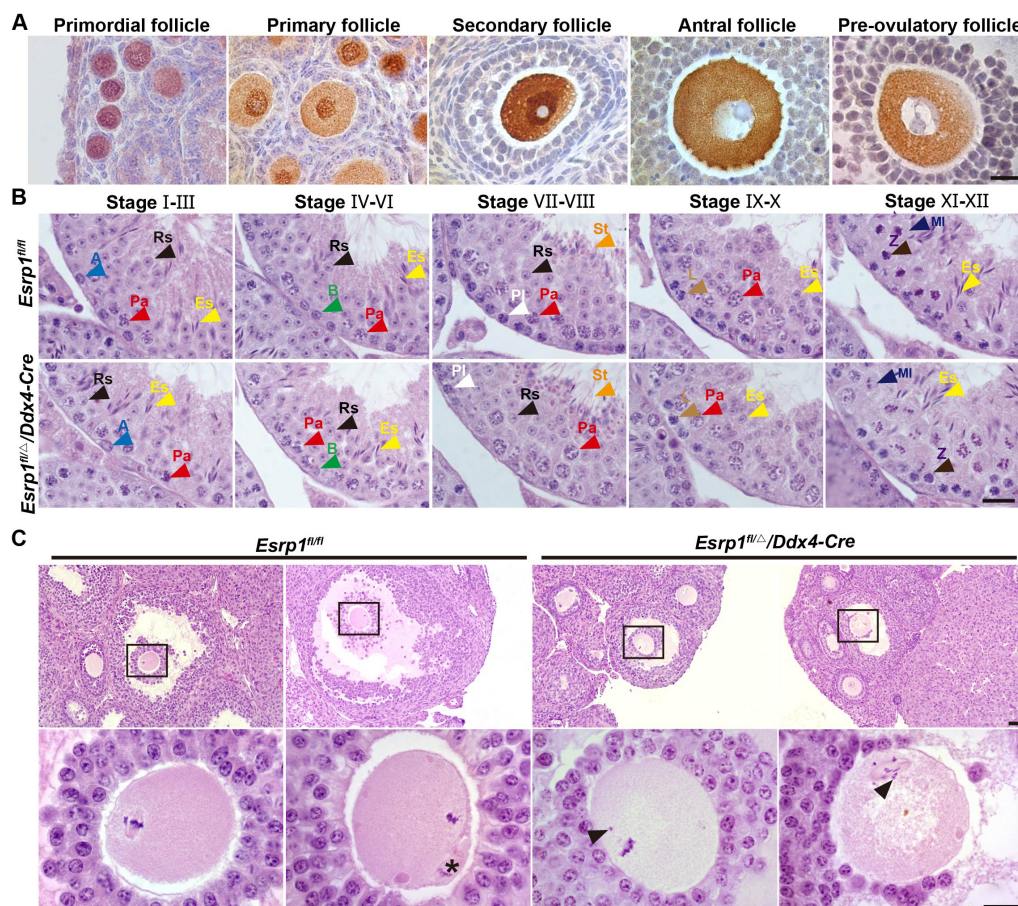

**Figure S1. Expression and subcellular localization of ESRP1 during follicular development.** (A) An immunohistochemistry (IHC) of ESRP1 in ovarian sections showing ESRP1 expression in follicles at indicated developmental stages. Scale bars, 20  $\mu$ m. (B) HE staining of adult *Esrp1<sup>fl/fl</sup>* and *Esrp1<sup>fl/Δ</sup>/Ddx4-Cre* testicular sections. Scale bars, 20  $\mu$ m. Abbreviations: A: Type A spermatogonia; B: Type B spermatogonia; PI: Preleptotene spermatocyte; L: Leptotene spermatocyte; Z: Zygotene spermatocyte; Pa: Pachytene spermatocyte; MI: Post-prophase I meiotic phase; Rs: Round spermatid; Es: Elongated spermatid; St: spermatozoa. (C) HE staining of six-week-old *Esrp1<sup>fl/fl</sup>* and *Esrp1<sup>fl/Δ</sup>/Ddx4-Cre* ovary sections. The magnified areas are shown in low panels. Asterisks indicate the PB1, and black arrowheads indicate scattered chromosomes. Scale bars, 20  $\mu$ m.

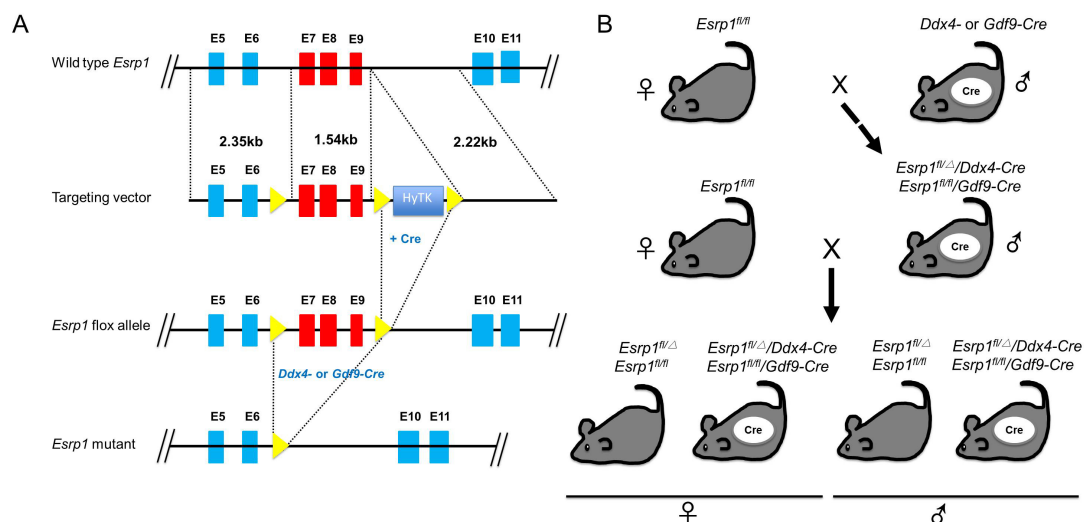

**Figure S2. Generation of *Esrp1* conditional-knockout mice.** (A) Construction of *Esrp1<sup>Flox/Flox</sup>* and generation of *Esrp1<sup>flox/Δ</sup>/Ddx4-Cre* and *Esrp1<sup>flox/Δ</sup>/Gdf9-Cre* mice. Exons 7–9 of *Esrp1* were deleted by *Ddx4-Cre*-mediated or *Gdf9-Cre*-mediated recombination. (B) Schematic of the breeding scheme to produce germline-specific *Esrp1* knockout in *Esrp1<sup>flox/Δ</sup>/Ddx4-Cre* mice and oocyte-specific *Esrp1* knockout in *Esrp1<sup>flox/Δ</sup>/Gdf9-Cre* mice.

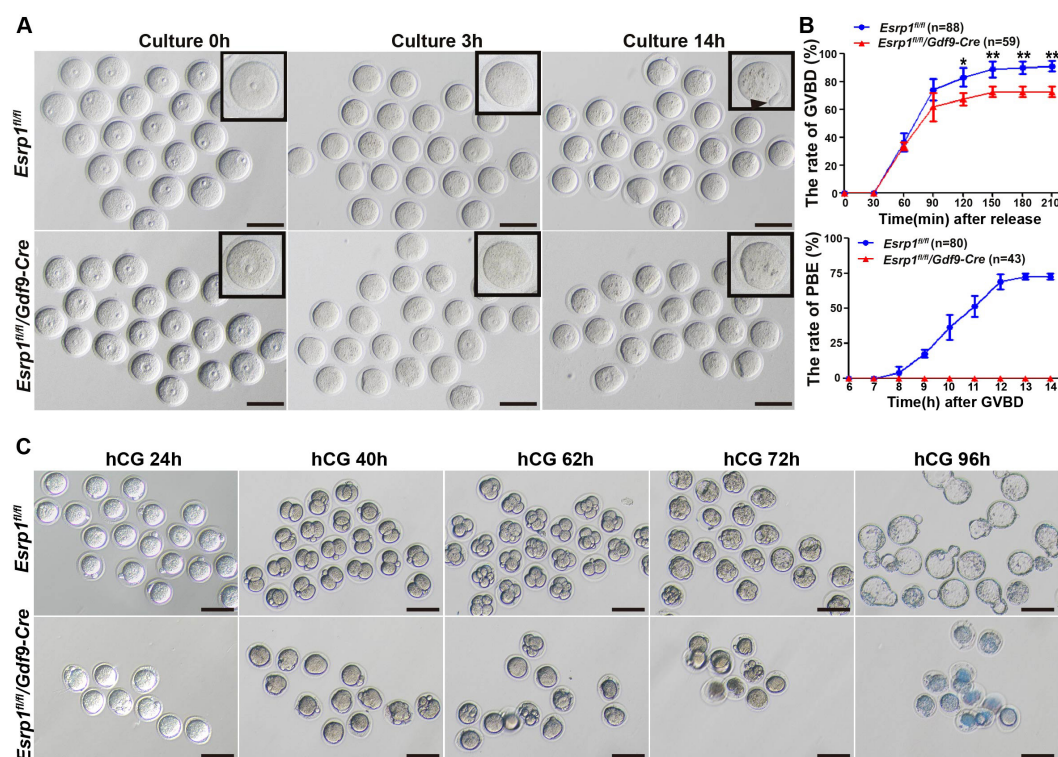

**Figure S3. Compromised meiosis and embryonic development in *Esrp1*-knockout oocytes.** (A) DIC imaging of the progression of meiosis in *Esrp1<sup>fl/fl</sup>* and *Esrp1<sup>fl/fl</sup>/Gdf9-Cre* oocytes in culture. Time indicates hours after oocytes were released from meiotic arrest. Scale bar, 100  $\mu$ m. (B) GVBD and PBE rates of cultured oocytes shown in (A). n: number of used oocytes. (C) DIC imaging of *Esrp1<sup>fl/fl</sup>* and *Esrp1<sup>fl/fl</sup>/Gdf9-Cre* female embryos cultured *in vitro*. Embryonic development was monitored at the indicated time points after hCG administration. Scale bar, 100  $\mu$ m.

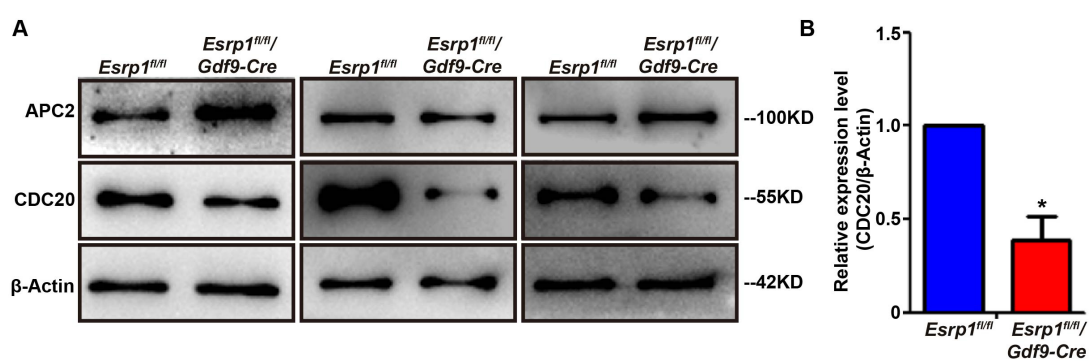

**Figure S4. Insufficient APC/C activity in *Esrp1*- knockout oocytes.**

(A) Western-blot analysis of APC2 and CDC20 in oocytes collected after 10 h in culture from *Esrp1<sup>fl/fl</sup>* and *Esrp1<sup>fl/fl</sup>/Gdf9-Cre* mice. β-actin served as a loading control.

(B) Relative abundances of CDC20 in oocytes from *Esrp1<sup>fl/fl</sup>* and *Esrp1<sup>fl/fl</sup>/Gdf9-Cre* mice were measured by Western-blot analyses shown in (A) (\*P < 0.05).



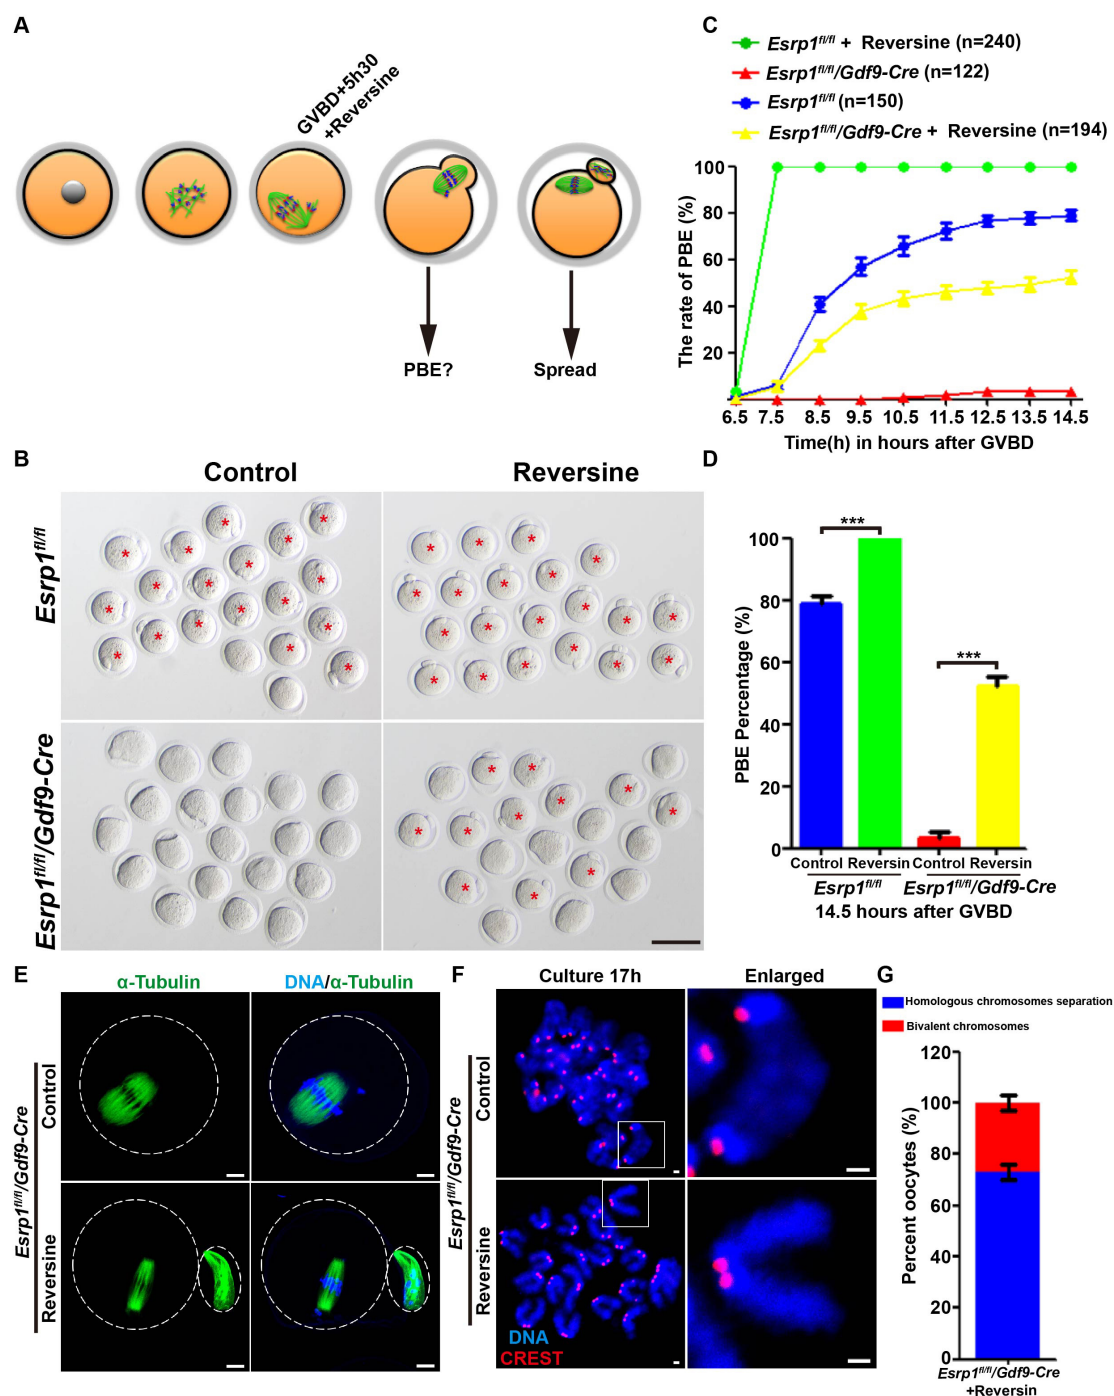

**Figure S5. Metaphase I arrest in *Esrp1*-knockout oocytes is rescued via inhibition of SAC activity.** (A) Oocytes were treated with reversine (0.5  $\mu$ M) at the indicated time to override a potential SAC arrest. (B) DIC imaging of *Esrp1<sup>fl/fl</sup>* and *Esrp1<sup>fl/fl</sup>/Gdf9-Cre* knockout oocytes treated with reversine shows that they completed the first meiosis, as determined by PBE cultured for 16.5 h. The asterisk indicates the PB1. Scale bar, 100  $\mu$ m. At least three independent experiments involving a total of at least six mice

were performed. (C) Time of PBE of *Esrp1<sup>fl/fl</sup>* and *Esrp1<sup>fl/fl</sup>/Gdf9-Cre* oocytes. Reversine was added at GVBD+5.5 h, where indicated. n: number of used oocytes. (D) Statistical analysis of the PBE rates of oocytes shown in (B). Data from *Esrp1<sup>fl/fl</sup>* oocytes (control: 78.96% ± 2.31%) and (reversine: 100%) are shown. Data from *Esrp1<sup>fl/fl</sup>/Gdf9-Cre* oocytes (control: 3.49% ± 1.78%) and (reversine: 52.58% ± 2.51%) are shown (\*\*P < 0.01, \*\*\*P < 0.001). (E) Immunofluorescent staining with  $\alpha$ -tubulin to visualize spindles (green) and co-stained with DAPI to visualize chromosomes (blue) show *Esrp1*-knockout oocytes had extruded PB1 after reversine treatment. Scale bar, 10  $\mu$ m. (F) Oocytes were spread 17 h after culture. Kinetochores were stained with CREST (red) and chromosomes with DAPI (blue). *Esrp1*-knockout oocytes had entered to metaphase II with univalent sister chromatids after reversine treatment. Insets show typical chromosome figures observed. Scale bar, 1  $\mu$ m. (G) The proportions of homologous chromosomes separation and bivalent chromosomes in *Esrp1*-knockout oocytes that failed to extrude the PB1 after reversine treatment.

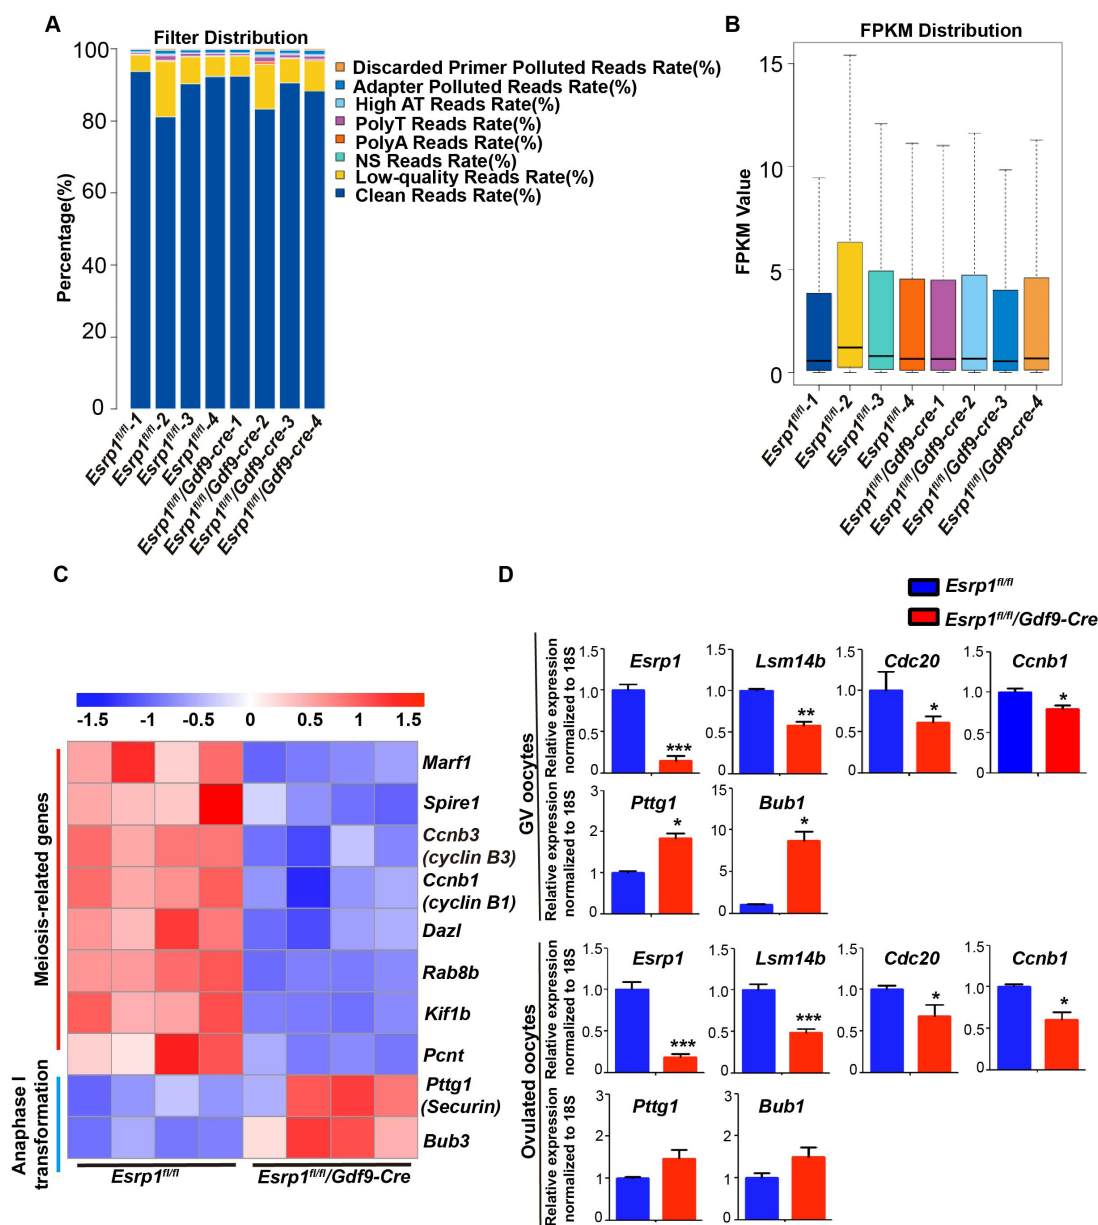

**Figure S6. ESRP1 regulates mRNA transcription involved in oocytes meiosis.** (A) Filter distribution in each sample; the clean reads were filtered for analyses. (B) Distribution of global gene expression in each sample. (C) A heatmap showing the transcript level of key genes that were involved in meiosis in *Esrp1<sup>fl/fl</sup>* and *Esrp1<sup>fl/fl</sup>/Gdf9-Cre* oocytes. The color indicates the expression level. (D) Real-time RT-PCR analysis of mRNA levels of a cohort of genes. The mRNA levels of *Esrp1*, *Lsm14b*, *cdc20*, and *Ccnb1* were decreased in both GV-stage and ovulated oocytes from *Esrp1<sup>fl/fl</sup>/Gdf9-Cre* mice compared to those in *Esrp1<sup>fl/fl</sup>* mice. The mRNA levels of *Bub1* and *Pttg1* were increased in both GV-stage and ovulated oocytes from *Esrp1<sup>fl/fl</sup>/Gdf9-Cre* mice compared to those in *Esrp1<sup>fl/fl</sup>* mice. (\* $p < 0.05$ , \*\* $p < 0.01$  and \*\*\* $p < 0.001$ ).

**Table S1. Primers used in this study.**

[Click here to Download Table S1](#)

**Table S2. Primary antibodies and secondary antibodies used in this study.**

[Click here to Download Table S2](#)

**Table S3. List of significantly changed transcripts in *Esrp1*-knockout oocytes identified by RNAseq analysis.**

[Click here to Download Table S3](#)

**Table S4. List of significant alternative-splicing events in *Esrp1*-knockout oocytes identified by CASH.**

[Click here to Download Table S4](#)



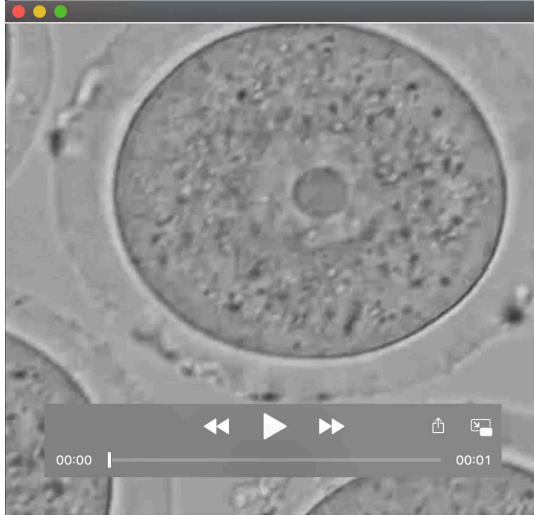

**Movies 1.** A representative movie showing normal meiosis in a control oocyte.

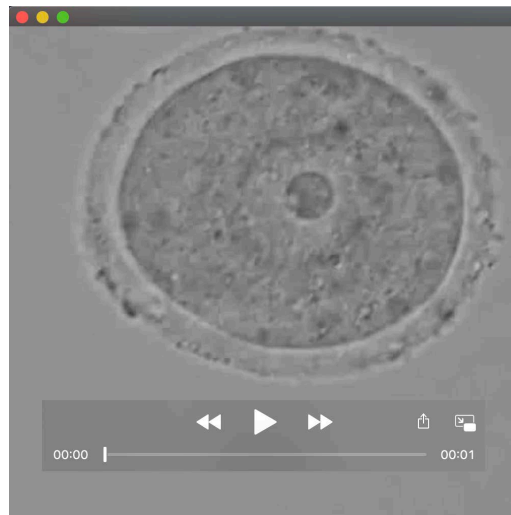

**Movies 2.** A representative movie showing no GVBD in an *Esrp1*-knockout oocyte.

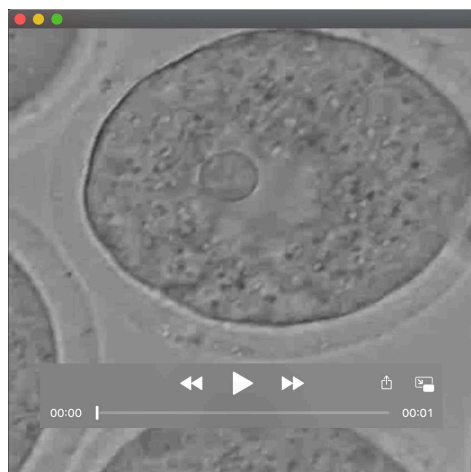

**Movies 3.** A representative movie showing no GVBD in a different *Esrp1*-knockout oocyte.
